# Supplementary figures and images for: Co-existence of Pd, Bi2O3and CuO supported on porous activated biocarbon for electrochemical conversion and energy storage
Source: Royal Society of Chemistry journal article supplement (doi:10.1039/d1nj02184b), 2021-01-01

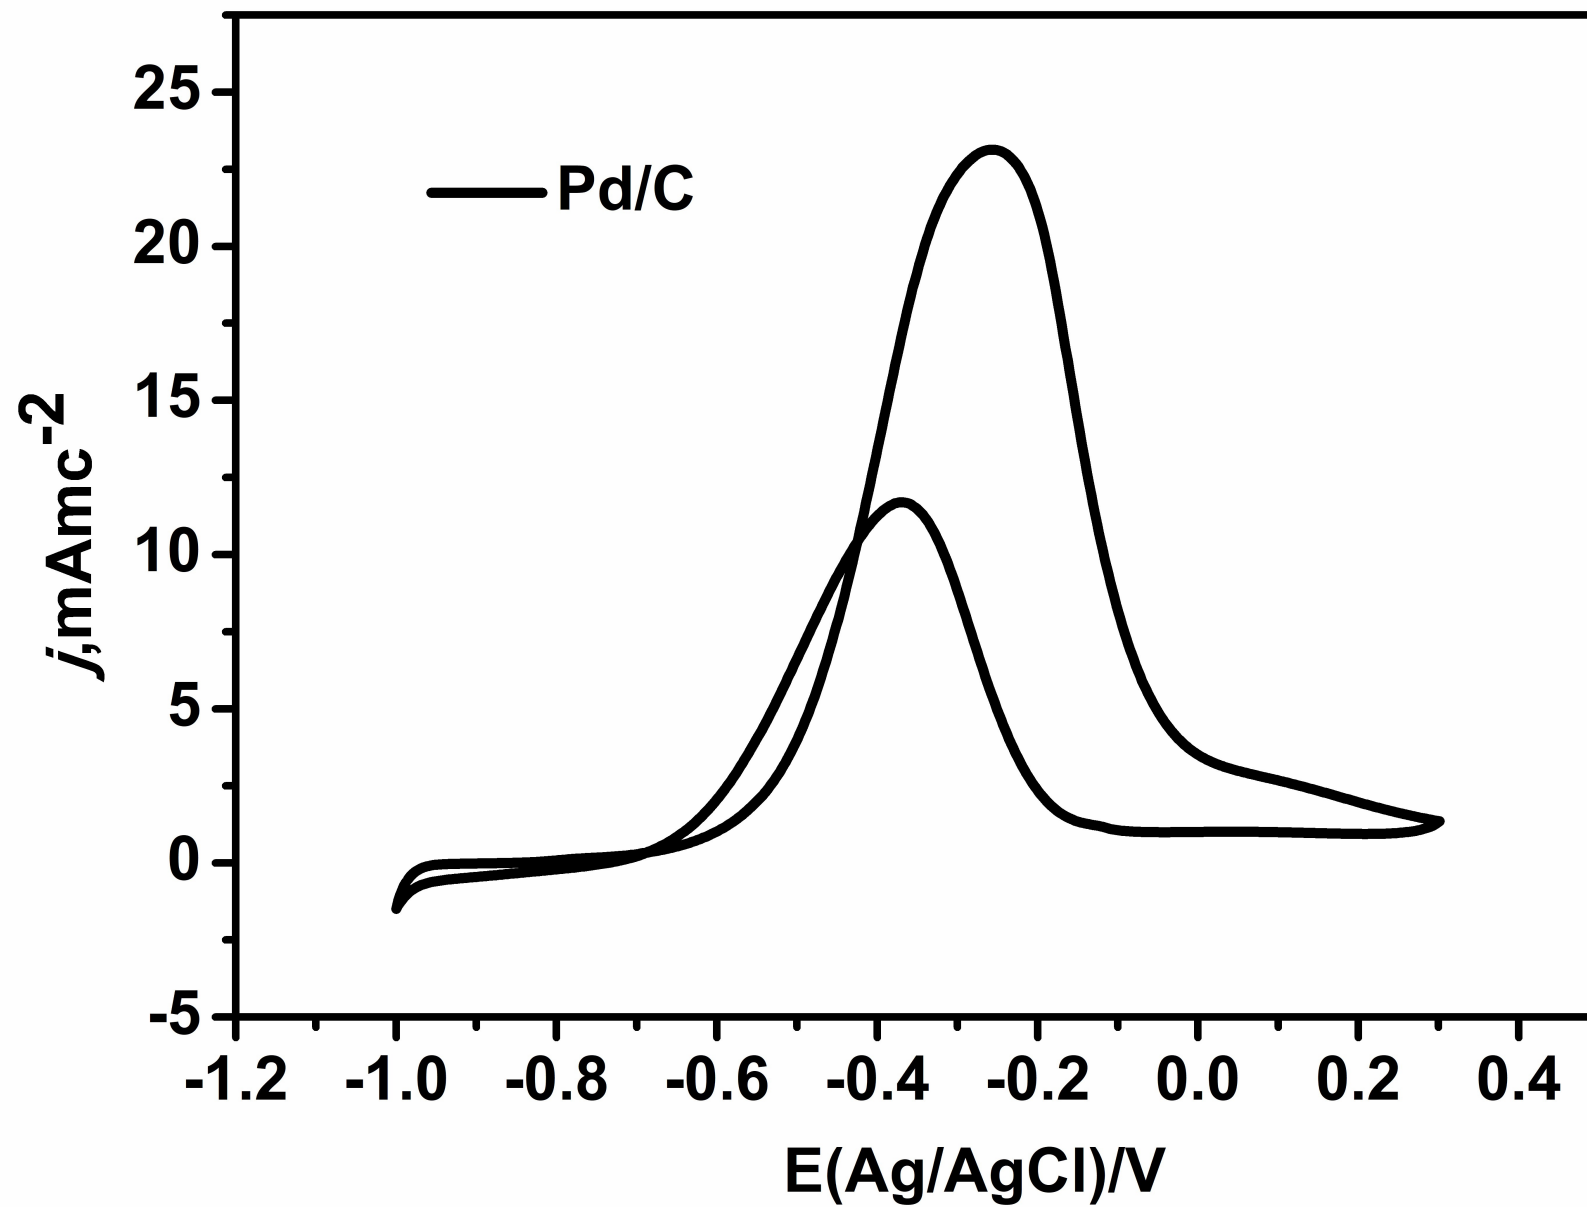

Supplement: d1nj02184b1.pdf [file d1nj02184b1.pdf]

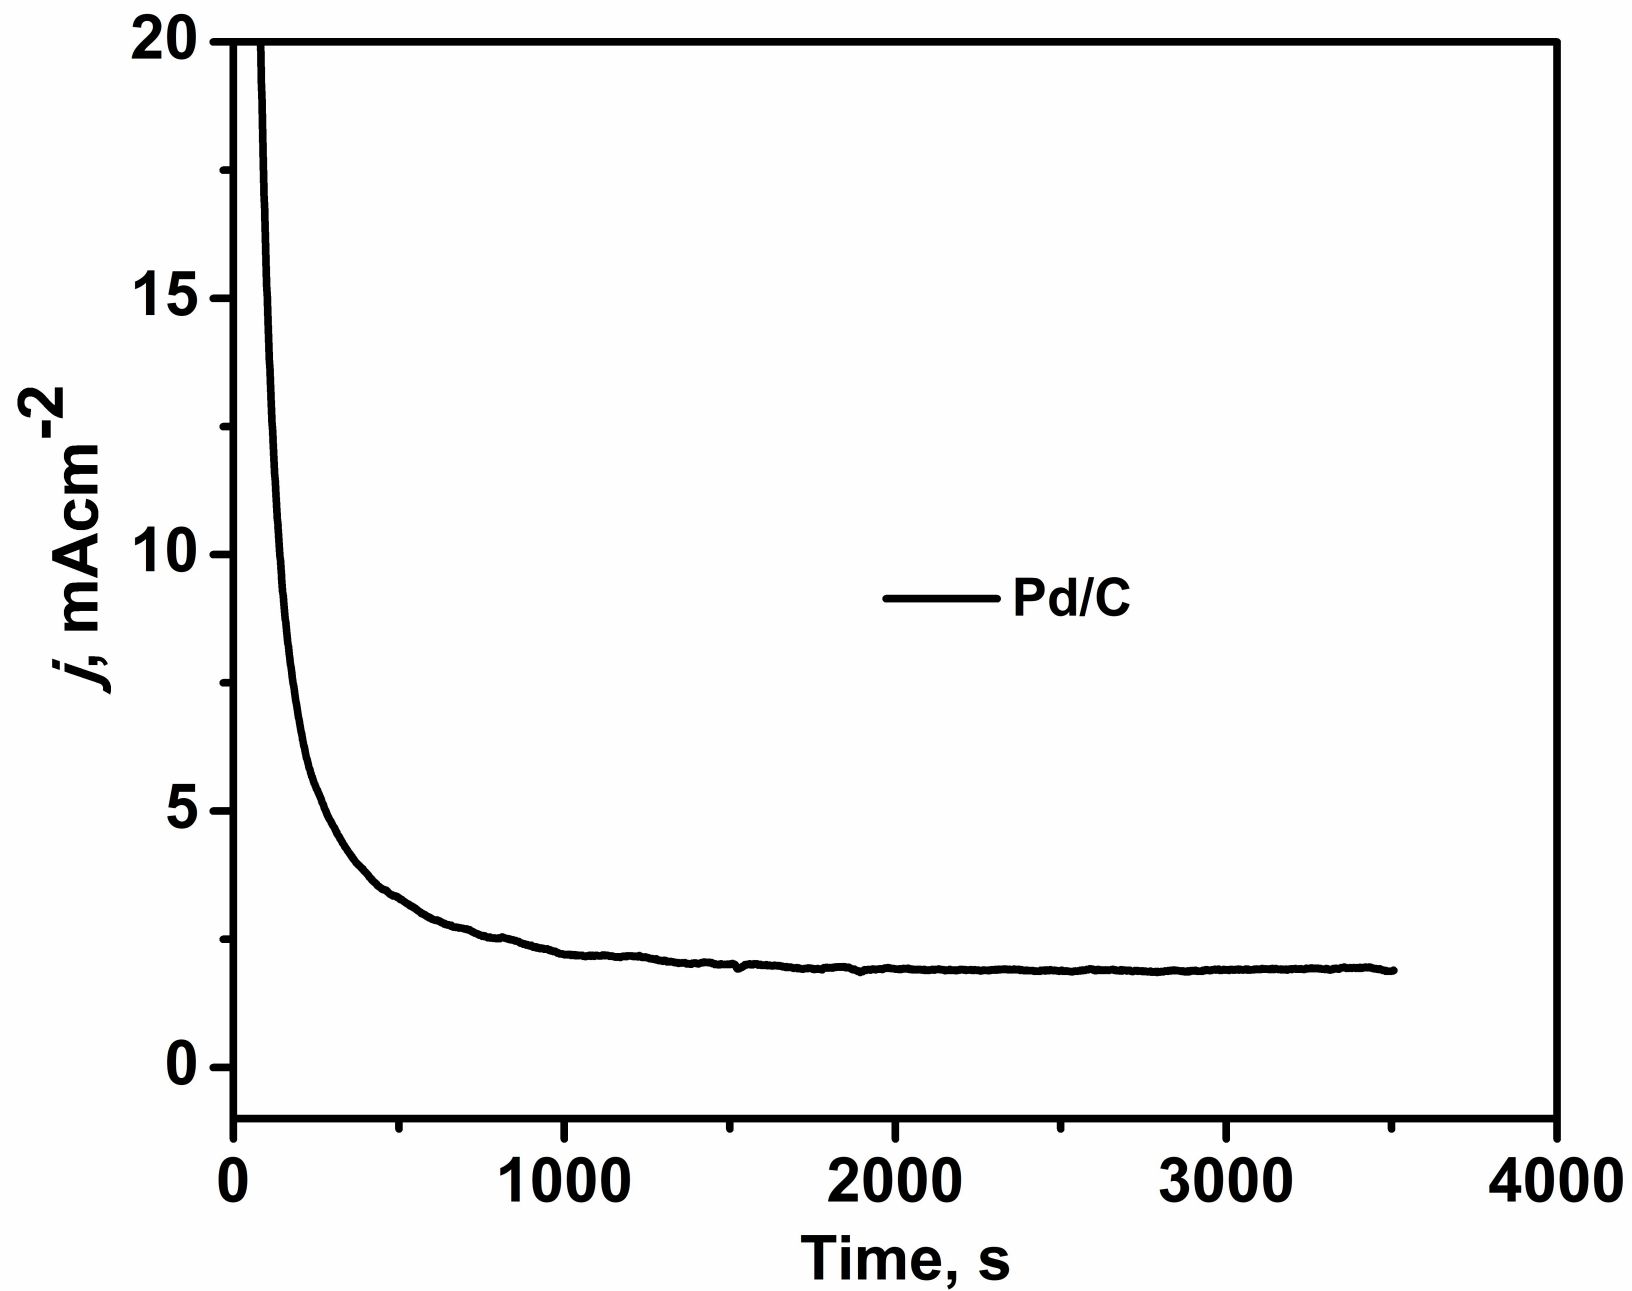

Supplement: d1nj02184b2.pdf [file d1nj02184b2.pdf]
